# Supplementary material
Source: publisher site journal article supplement (https://www.spandidos-publications.com/3595/downloadSupplementary)

Figure S1. RepSox inhibits cell proliferation and colony formation and induces S-phase arrest. (A-D) Relative expression of cycle-related genes after treatment with different concentrations of RepSox in HOS and 143B cell lines. CDK, cyclin-dependent kinases; ns, no significance. \* $P<0.05$ , \*\* $P<0.01$  and \*\*\* $P<0.001$  vs. the control.

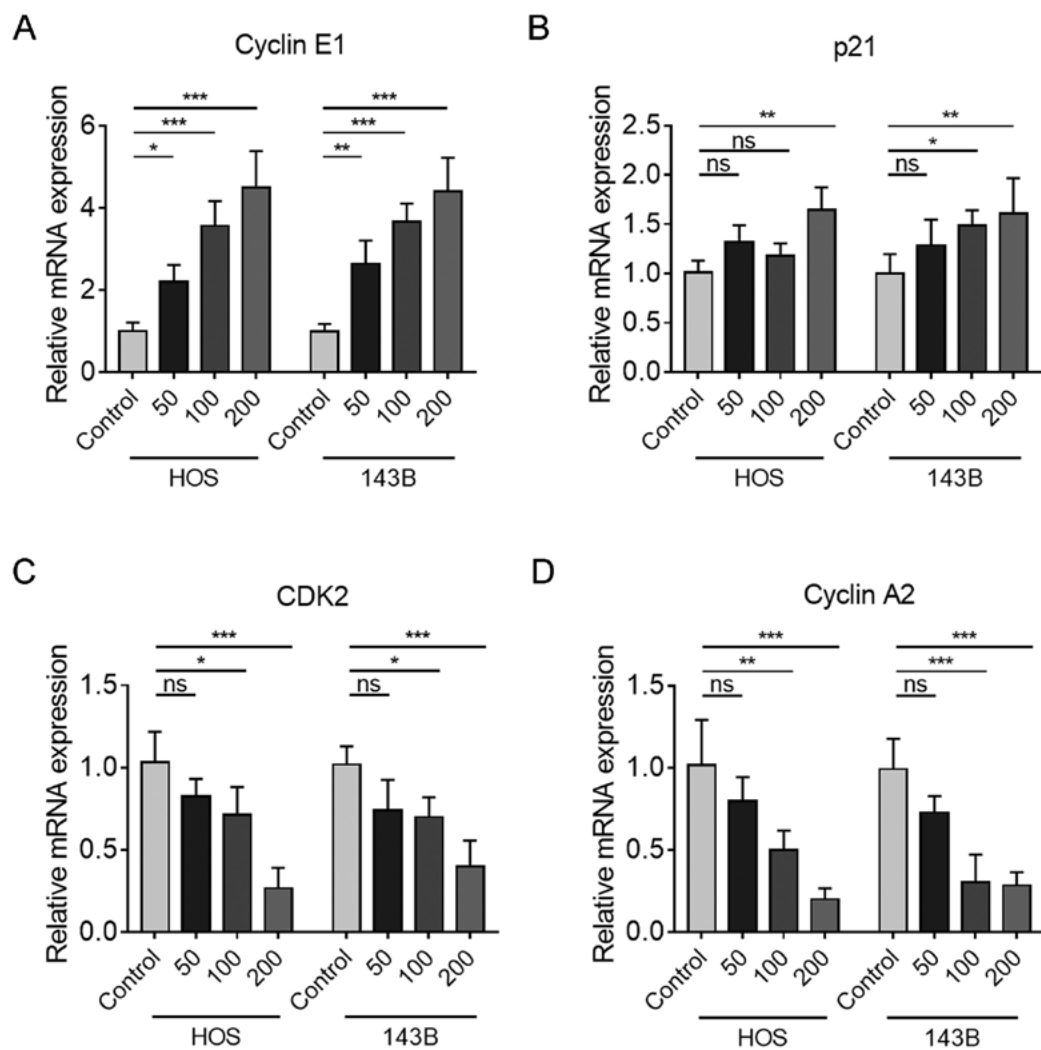

Supplement: Supplementary file 1 [file downloadSupplementary]
